# Supplementary material for: Nanoporous Mn-based electrocatalysts through thermal conversion of cyano-bridged coordination polymers toward ultra-high efficiency hydrogen peroxide production
Source: Royal Society of Chemistry journal article supplement (doi:10.1039/c6ta01470d), 2016-01-01
Supplement: c6ta01470d1.pdf [file c6ta01470d1.pdf]

# Nanoporous Mn-Based Electrocatalysts through Thermal Conversion of Cyano-Bridged Coordination Polymers toward Ultra-High Efficient Hydrogen Peroxide Production

Mohamed B. Zakaria<sup>1,2,3</sup>, Cuiling Li<sup>2\*</sup>, Malay Pramanik<sup>2</sup>, Yoshihiro Tsujimoto<sup>4</sup>,

Ming Hu<sup>5</sup>, Victor Malgras<sup>2</sup>, Satoshi Tominaka<sup>2</sup>, and Yusuke Yamauchi<sup>\*1,2,6</sup>

*1 Faculty of Science and Engineering, Waseda University, 3-4-1 Okubo, Shinjuku, Tokyo, 169-8555, Japan.*

*2 World Premier International (WPI) Research Center for Materials Nanoarchitectonics (MANA), National Institute for Materials Science (NIMS), 1-1 Namiki, Tsukuba, Ibaraki 305-0044, Japan.*

*3 Department of Chemistry, Faculty of Science, Tanta University, Tanta, Gharbeya 31527, Egypt.*

*4 Materials Processing Unit, National Institute for Materials Science, 1-2-1 Sengen, Tsukuba, Ibaraki 305-0047, Japan.*

*5 Department of Physics, East China Normal University, Physical Building, 500 Dongchuan Road, Shanghai, China*

*6 Australian Institute for Innovative Materials (AIIM), University of Wollongong, Squires Way, North Wollongong, NSW 2005, Australia*

*E-mails: [LI.Cuiling@nims.go.jp](mailto:LI.Cuiling@nims.go.jp); [Yamauchi.Yusuke@nims.go.jp](mailto:Yamauchi.Yusuke@nims.go.jp)*

*Homepage: <http://www.yamauchi-labo.com>*

**Figure S1**

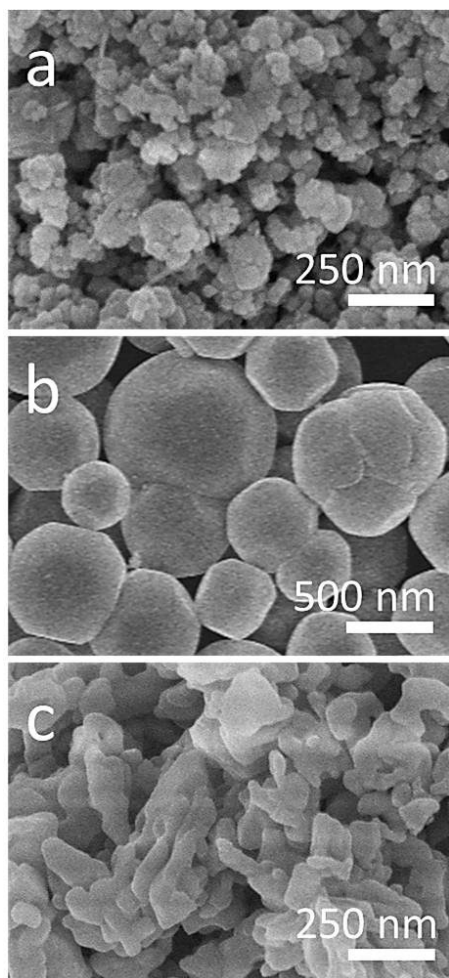

**Figure S1** SEM images of the (a) MnCNMn, (b) MnCNCo, and (c) MnCNRu PBAs, prepared in the absence of TSCD.

**Figure S2**

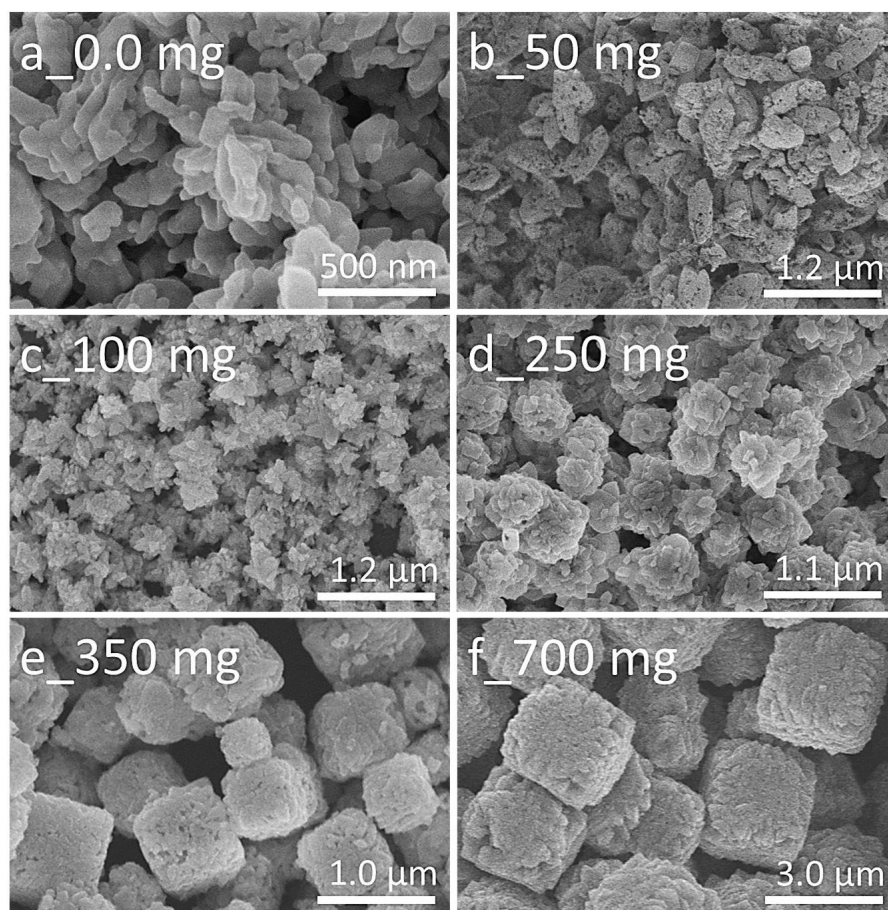

**Figure S2** SEM images of the MnCNRu prepared with various amounts of TSCD.

**Figure S3**

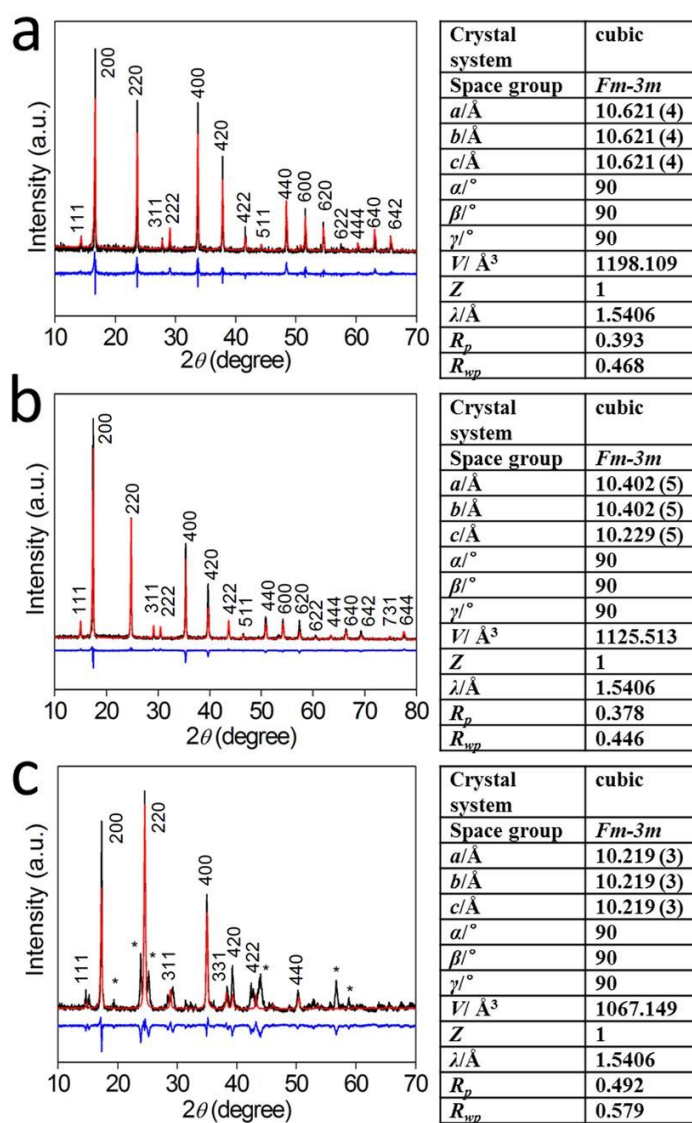

**Figure S3** Experimental XRD patterns (black line), computed XRD patterns (red line), and the residuals (blue line) of (a) MnCNMn, (b) MnCNCo, and (a) MnCNRu. The peaks indicated by (\*) are generated from impurities.

**Figure S4**

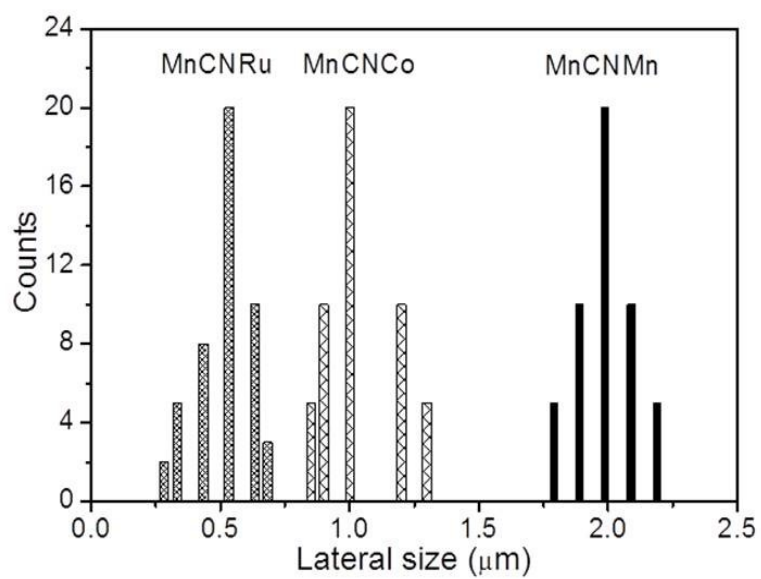

**Figure S4** Particle size distributions obtained from TEM images of (a) MnCNMn, (b) MnCNCo, and (a) MnCNRu PBAs.

**Figure S5**

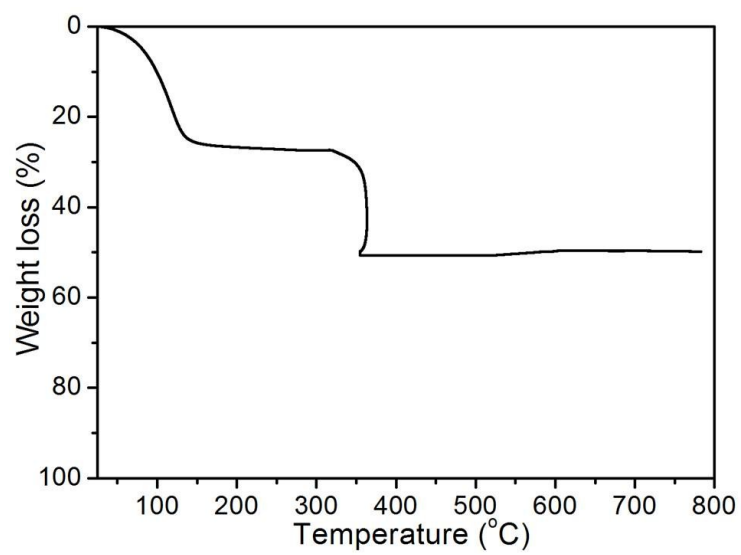

**Figure S5** TG curve of MnCNCo at a heating rate of 5 °C min<sup>-1</sup> from room temperature to 800 °C.

**Figure S6**

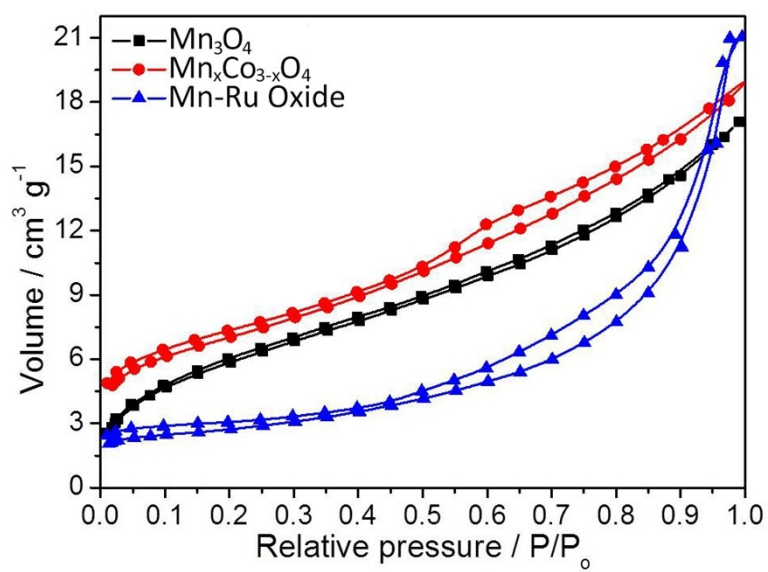

**Figure S6** N<sub>2</sub> gas adsorption-desorption isotherms of Mn<sub>3</sub>O<sub>4</sub>, Mn<sub>x</sub>Co<sub>3-x</sub>O<sub>4</sub>, and Mn-Ru oxide.

**Figure S7**

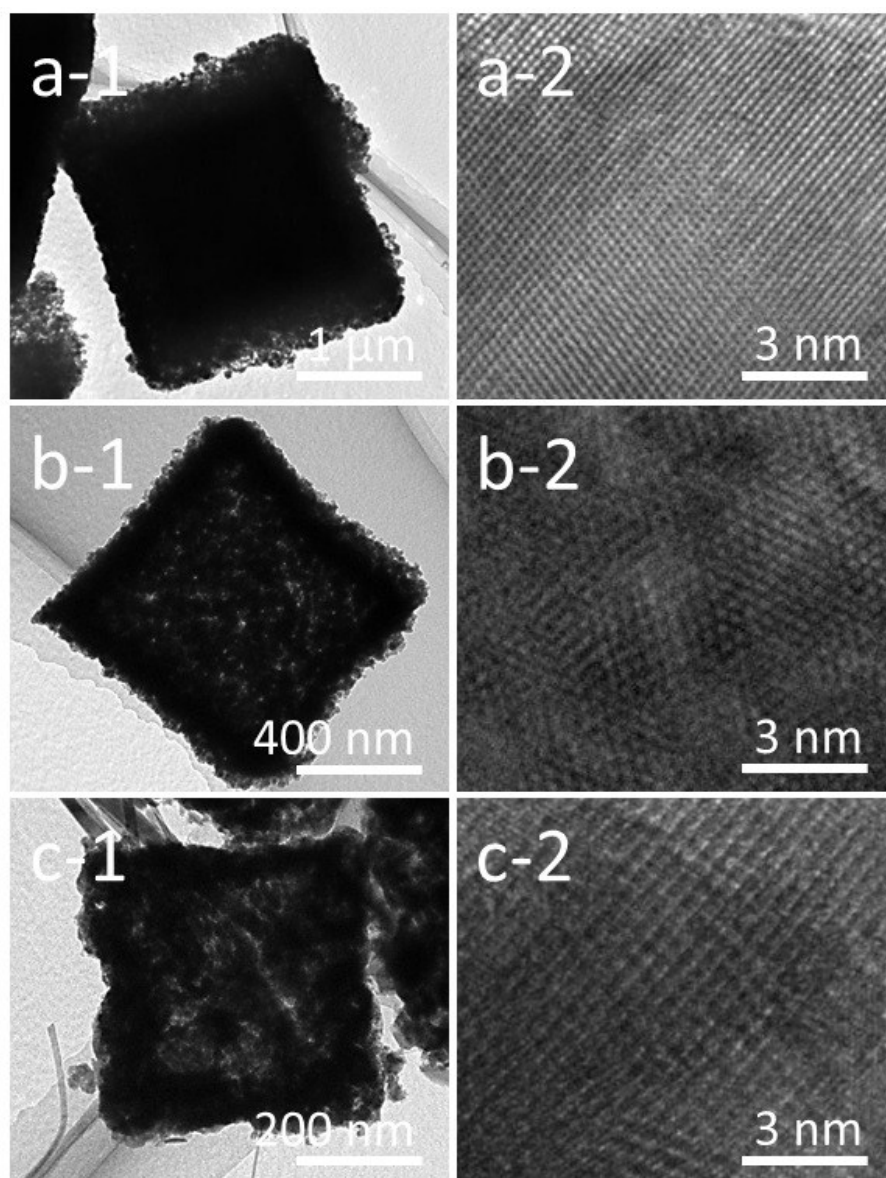

**Figure S7** TEM and HRTEM images of the corresponding metal oxides prepared from (a) MnCNMn, (b) MnCNCo, and (c) MnCNRu PBAs.



**Figure S8**

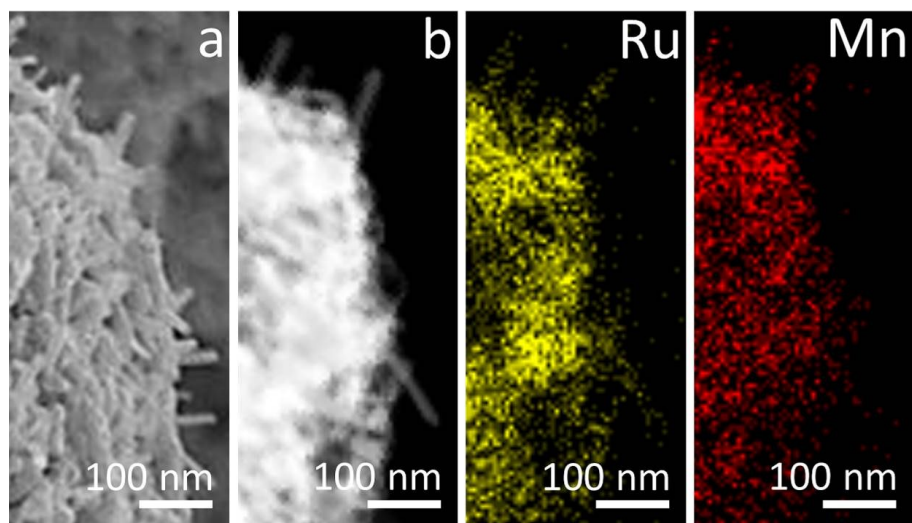

**Figure S8** (a) SEM image and (b) HAADF-STEM images and the corresponding elemental mapping of the Mn-Ru oxides prepared from MnCNRu PBAs.

**Figure S9**

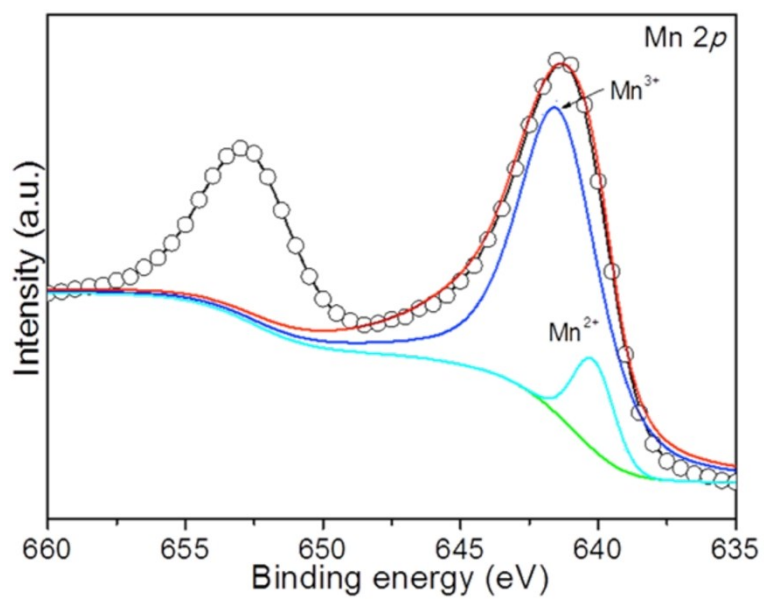

**Figure S9** XPS spectra centered on Mn 2*p* in the Mn-Ru oxide.

**Figure S10**

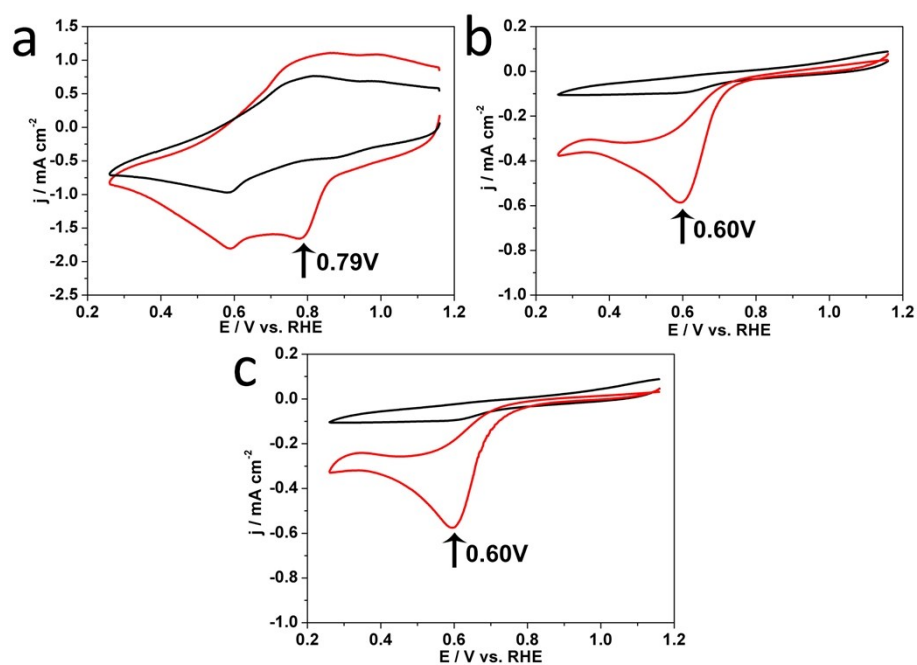

**Figure S10** CV curves obtained under (black plot)  $\text{N}_2$ - and (red plot)  $\text{O}_2$ -saturated 0.1 M KOH catalyzed by (a) Mn oxide, (b) Mn-Co oxide, and (c) Mn-Ru oxide prepared from MnCNMn, MnCNCo, and MnCNRu PBAs, respectively.

**Figure S11**

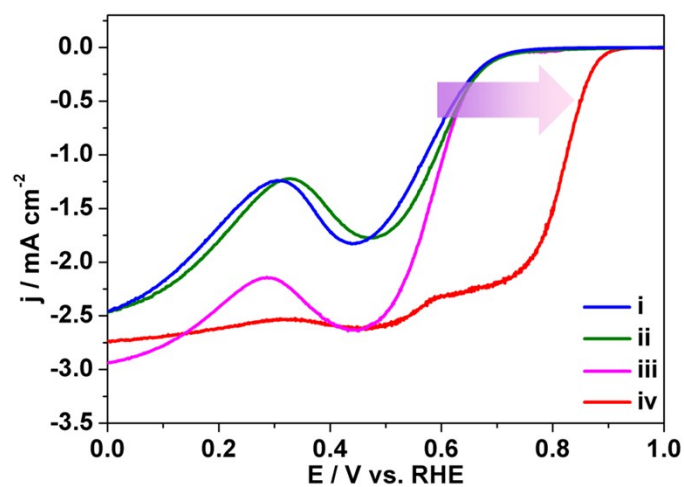

**Figure S11** ORR polarization curves of (i) Mn oxide prepared from MnCNMn, (ii) Mn-Co oxide prepared from MnCNCo, (iii) commercially available RuO<sub>2</sub>, and (iv) Mn-Ru oxide prepared from MnCNRu.

**Figure S12**

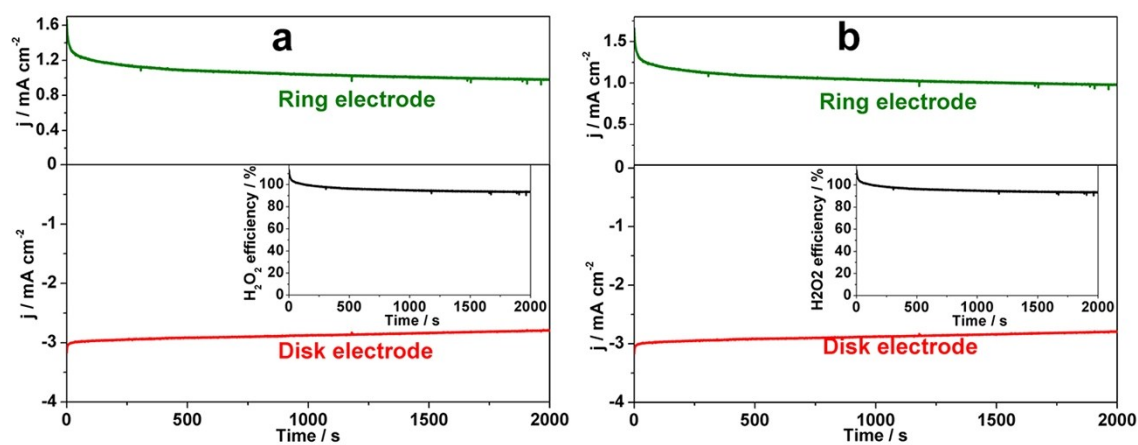

**Figure S12** Chronoamperometric curves obtained at disk and ring electrodes at different constant potentials: (a) 0.65V and (b) 0.55V. The measurements were carried out in  $\text{O}_2$ -saturated 0.1M KOH at a rotation speed of 1600 rpm. The corresponding  $\text{H}_2\text{O}_2$  production efficiencies were shown in the insets.

**Figure S13**

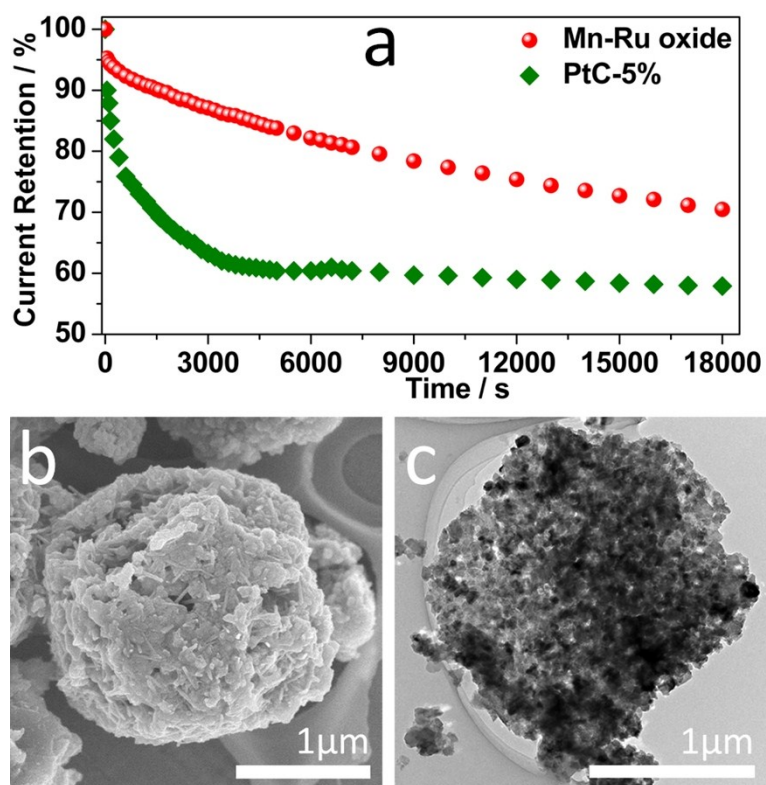

**Figure S13 (a)** Current retention plot during chronoamperometric measurements for the Mn-Ru oxide and commercially available PtC-5% catalysts. (b) SEM and (c) TEM images of the Mn-Ru oxide after long-term stability measurement.

**Table S1** Comparison between the electrocatalytic activity toward ORR of our catalysts and other previously reported materials.  $n$  is the number of electron transferred during the ORR.

| Sample information                                               | Electrolyte      | Onset potential*<br>(mV vs. RHE) | $n$ | References                              |
|------------------------------------------------------------------|------------------|----------------------------------|-----|-----------------------------------------|
| Mn-Ru oxide                                                      | 0.1M KOH         | 910                              | 2.0 | Present work                            |
| $Mn_xCo_{3-x}O_4$                                                | 0.1M KOH         | 762                              | 2.0 | Present work                            |
| $Mn_3O_4$                                                        | 0.1M KOH         | 762                              | 2.0 | Present work                            |
| Mesoporous N-doped carbon                                        | 0.1M KOH         | 730                              | 2.6 | Adv. Funct. Mater. 2012, 22, 4584       |
| Reduced graphene oxide                                           | 0.1M KOH         | 810                              | 2.7 | Chem. Commun. 2013, 49, 6334            |
| N-doped graphene                                                 | 0.1M KOH         | 800                              | 2.7 | Nat. Mater. 2011, 10, 780               |
| $CoMn_2O_4$                                                      | 0.1M KOH or KCl  | 780                              | 2.9 | Nat. Chem. 2011, 3, 79                  |
| $Co_2MnO_4$                                                      | 0.1M KOH or KCl  | 850                              | 3.3 | Nat. Chem. 2011, 3, 79                  |
| $Co_xMn_{3-x}O_4$                                                | 0.1M KOH or KCl  | 860                              | 3.4 | Nat. Chem. 2011, 3, 79                  |
| Porous calcium-manganese oxide<br>( $Ca_2Mn_3O_8$ ) microspheres | 0.1M KOH         | 850                              | 3.5 | Chem. Sci. 2013, 4, 368                 |
| $Co_xMn_{3-x}O_4$                                                | 0.1 M KOH or KCl | 880                              | 3.7 | Nat. Chem. 2011, 3, 79                  |
| $Co_3O_4$ /graphene composite                                    | 1.0M KOH         | 864                              | 3.7 | J. Am. Chem. Soc. 2012, 134, 3517       |
| Manganese oxide containing<br>mesoporous N-doped carbon          | 0.1M KOH         | 810                              | 3.8 | Adv. Funct. Mater. 2012, 22, 4584       |
| Flower-like manganese oxide on<br>reduced graphene oxide         | 0.1M KOH         | 840                              | 3.8 | Chem. Commun. 2013, 49, 6334            |
| Spinel $MnCo_2O_4$ / graphene<br>composite                       | 1.0M KOH         | 885                              | 3.9 | J. Am. Chem. Soc. 2012, 134, 3517       |
| $Co_3O_4$ nanocrystals on graphene                               | 0.1M KOH         | 880                              | 3.9 | Nat. Mater. 2011, 10, 780               |
| Iron-based catalyst (Fe-N/C)                                     | 0.1M KOH         | 700                              | 3.9 | Nat. Mater. 2011, 10, 780               |
| Platinum/carbon                                                  | 0.1M KOH or KCl  | 50                               | 3.9 | Nat. Chem. 2011, 3, 79                  |
| Spinel $MnCo_2O_4$ nanoparticles +<br>graphene sheet mixture     | 1.0M KOH         | 845                              | 4.0 | J. Am. Chem. Soc. 2012, 134, 3517       |
| N-doped graphene sheets                                          | 1.0M KOH         | 830                              | 4.0 | J. Am. Chem. Soc. 2012, 134, 3517       |
| Manganese oxide ( $\beta$ - $MnO_2$ )                            | 0.1M KOH         | 800                              | 4.0 | Angew. Chem. Int. Ed. 2013, 52,<br>2474 |
| Layer-by-layer structured NiO-GO<br>nanocomposite                | 0.1M KOH         | 860                              | --- | Chem. Commun. 2015, 51, 16409           |
| Cobalt and nitrogen-functionalized<br>graphene                   | 0.1M KOH         | 862                              | --- | J. Mater. Chem. A 2013, 1, 3593         |

\*: The potential in the present study was firstly recorded by using Ag/AgCl electrode. After the calibration of the reference electrode with respect to the reversible hydrogen electrode (RHE), the obtained potentials were converted to the scale against RHE.
